# Supplementary material for: Thermal Decomposition, Low Temperature Phase Transitions and Vapor Pressure of Less Common Ionic Liquids Based on the Bis(trifuoromethanesulfonyl)imide Anion
Source: MDPI journal article supplement (doi:10.3390/ma15155255), 2022-07-29
Supplement: s1 [file s1]

Supplementing Information

# Thermal decomposition, low temperature phase transitions and vapor pressure of less common ionic liquids based on the bis(trifluoromethanesulfonyl)imide anion.

Annalisa Paolone<sup>1,\*</sup>, Boumediene Haddad<sup>2,3</sup>, Didier Villemin<sup>3</sup>, Mostefa Boumediene<sup>2</sup>, Bekhaled Fetouhi<sup>4</sup>, Mohammed Amin Assenine<sup>2,5</sup>

<sup>1</sup> Consiglio Nazionale delle Ricerche, Istituto dei Sistemi Complessi, U.O.S. La Sapienza, Piazzale A. Moro 5, 00185 Roma, Italy.

<sup>2</sup> Chemistry Laboratory of Synthesis, Properties, and Applications (CLSPA-Saida), University of Saida, Algeria; haddadboumediene@yahoo.com, m.boumediene68@gmail.com

<sup>3</sup> LCMT, ENSICAEN, UMR 6507 CNRS, University of Caen, 6 bd MI Juin, 14050 Caen, France; didier.villemin@ensicaen.fr

<sup>4</sup> Synthesis and Catalysis Laboratory LSCT, Tiaret University, Tiaret, Algeria; k.fetouhi@gmail.com

<sup>5</sup> Université Djillali Liabes, BP89, 22000 Sidi-Bel-Abbes, Algeria; asseninema@gmail.com

\* Correspondence: annalisa.paolone@roma1.infn.it

**Citation:** Paolone, A.; Haddad, B.; Villemin, D.; Boumediene, M.; Fetouhi, B.; Assenine, M.A. Thermal Decomposition, Low Temperature Phase Transitions and Vapor Pressure of Less Common Ionic Liquids based on the Bis(trifluoromethanesulfonyl)imide Anion. *Materials* **2022**, *15*, 5255. <https://doi.org/10.3390/ma15155255>

Academic Editor: Andreas Taubert

Received: 14 July 2022

Accepted: 27 July 2022

Published: 29 July 2022

**Publisher's Note:** MDPI stays neutral with regard to jurisdictional claims in published maps and institutional affiliations.

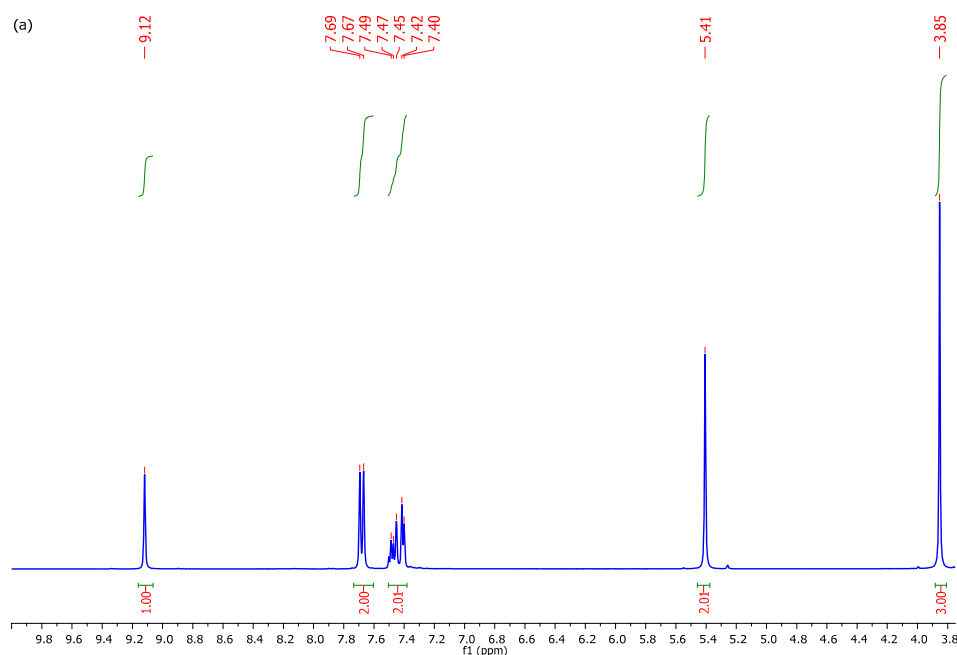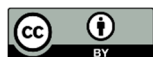

**Copyright:** © 2022 by the authors. Licensee MDPI, Basel, Switzerland. This article is an open access article distributed under the terms and conditions of the Creative Commons Attribution (CC BY) license (<https://creativecommons.org/licenses/by/4.0/>).

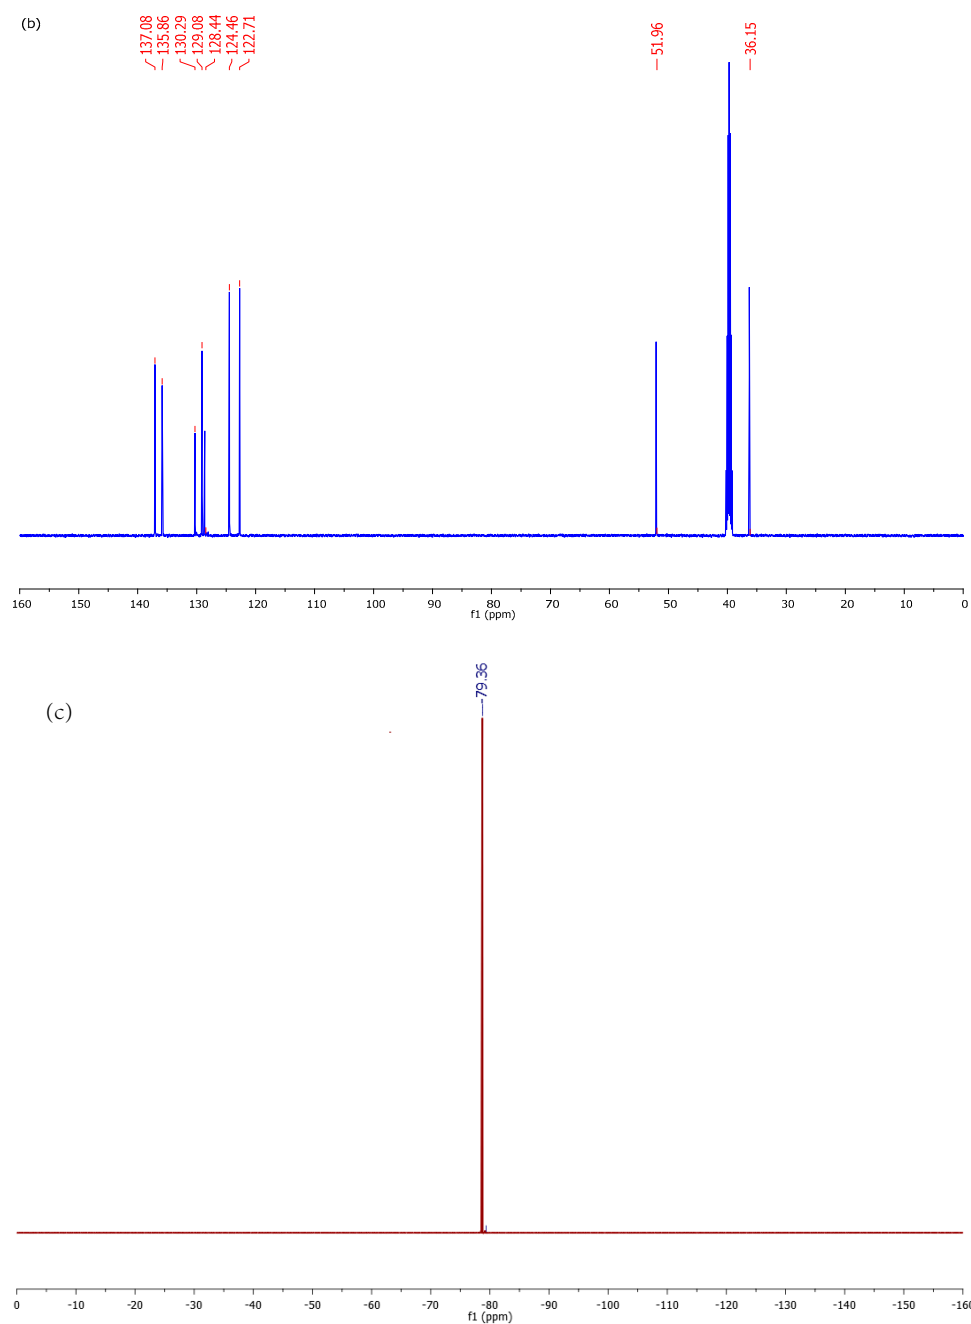

**Figure S1.**  $^1\text{H}$  NMR (500 MHz) (a),  $^{13}\text{C}$  NMR (125.75 MHz) (b) and  $^{19}\text{F}$  NMR (470.62 MHz) (c) of  $[\text{m-C}_6\text{H}_4(\text{CH}_2\text{ImMe})_2^+][\text{NTf}_2^-]_2$ .

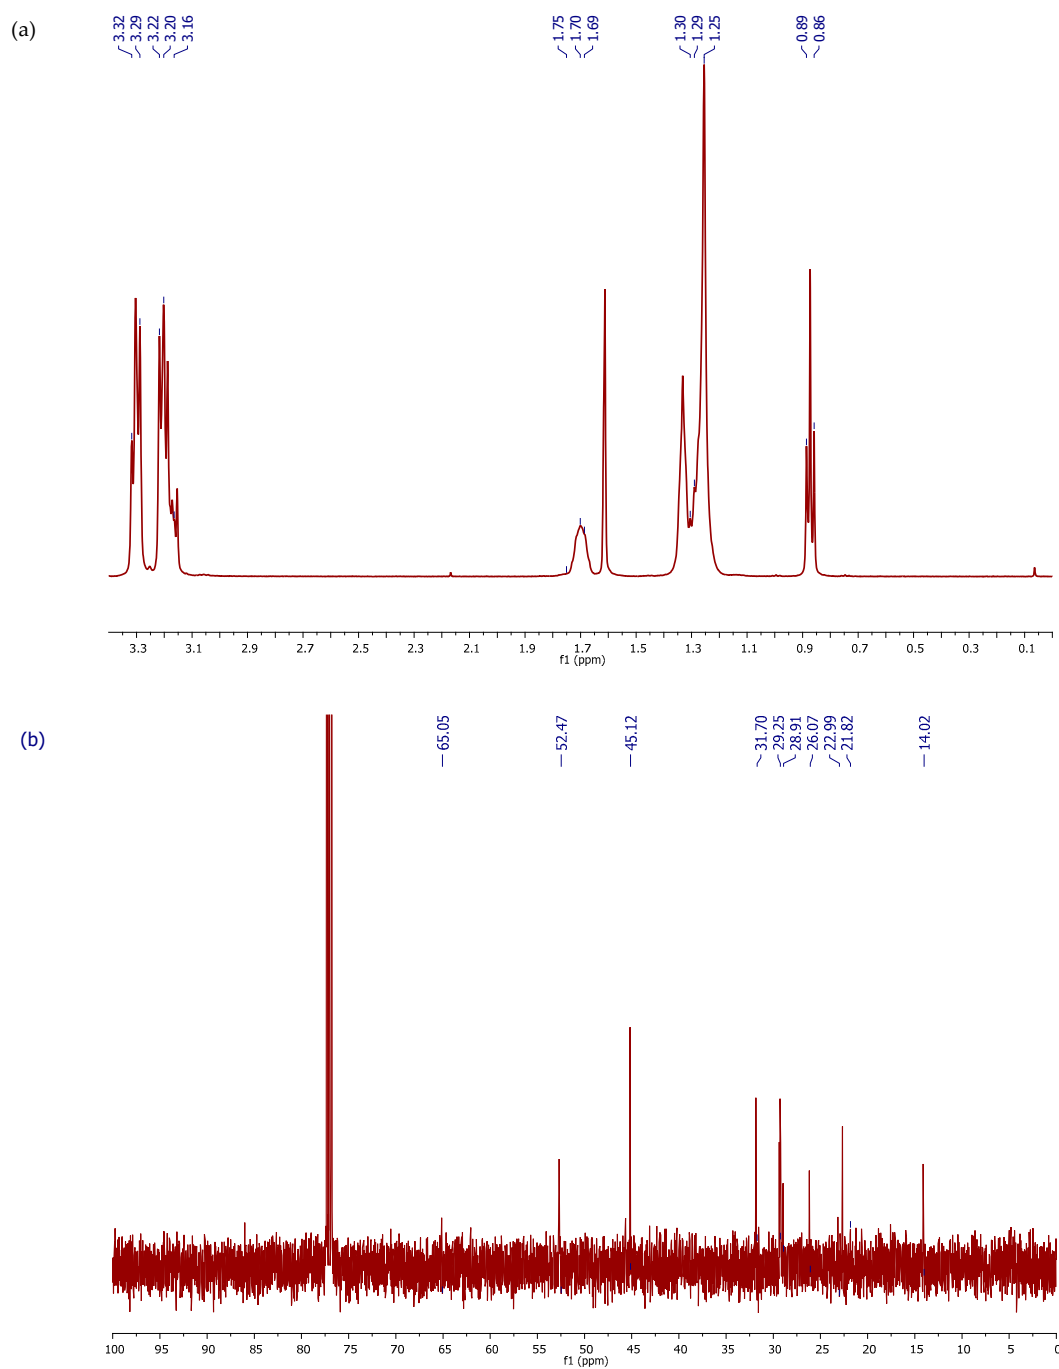

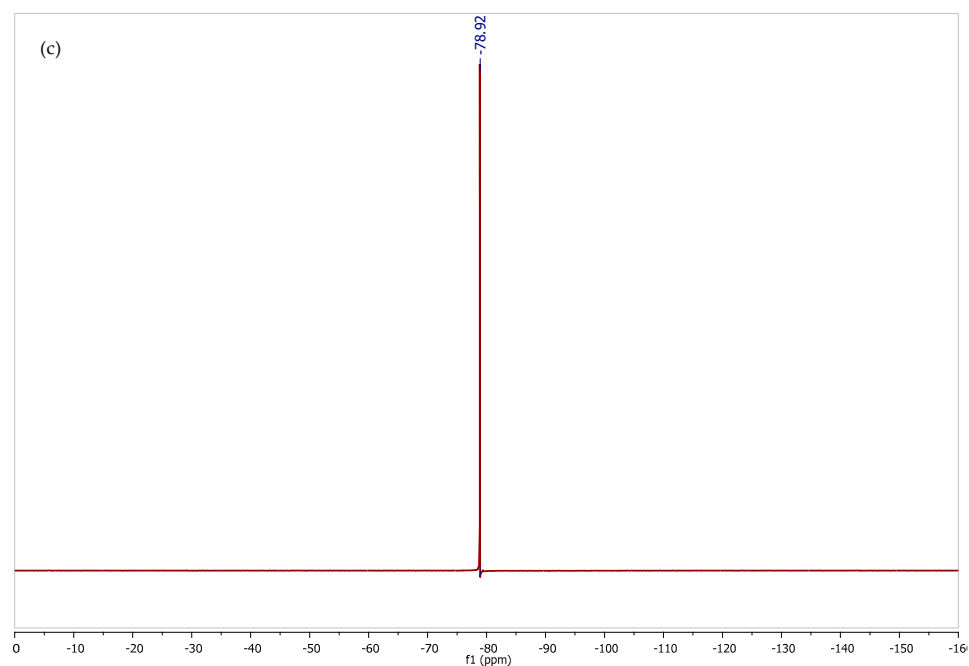

**Figure S2.**  $^1\text{H}$  NMR (500 MHz) (a),  $^{13}\text{C}$  NMR (125.75 MHz) (b) and  $^{19}\text{F}$  NMR (470.62 MHz) (c) of  $[\text{DABCO10}^+][\text{NTf}_2^-]$ .

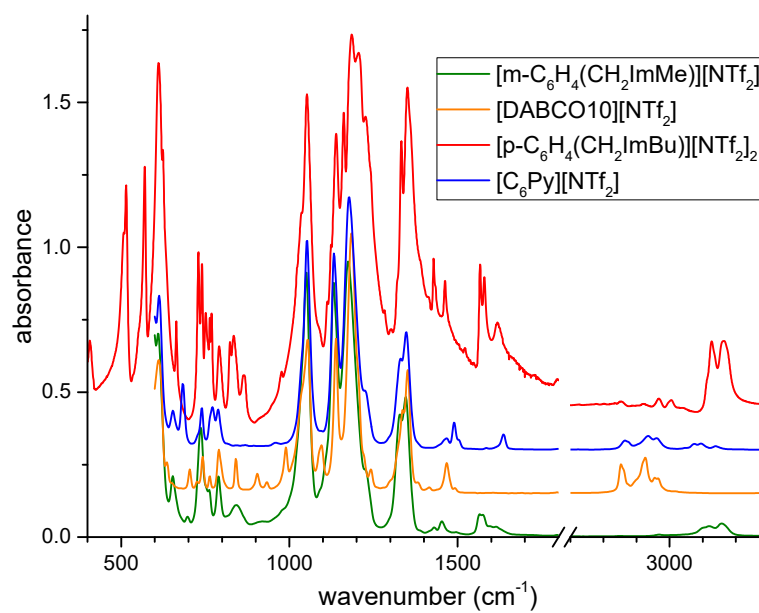

**Figure S3.** Infrared absorption spectra of the four ionic liquids.

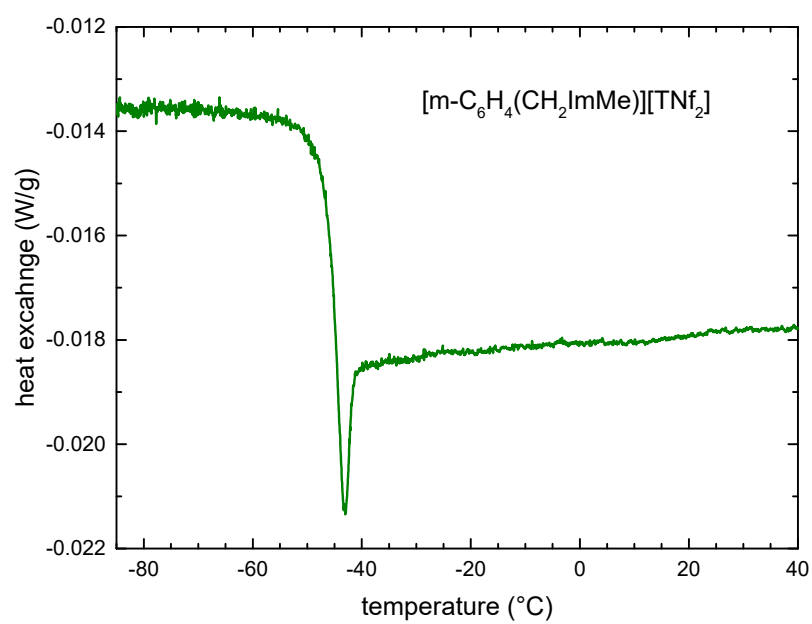

**Figure S4.** DSC trace of  $[m\text{-C}_6\text{H}_4(\text{CH}_2\text{ImMe})]_2[\text{NTf}_2]_2$ , measured with a scanning rate of 1 °C/min.
